# Supplementary material
Source: publisher site journal article supplement (https://www.dovepress.com/article/supplementary_file/613742/Table%20S1.docx)
Supplement: Supplementary file 1 [file Table%20S1.docx]

Table S1 Baseline Characteristics of ECMO Patients by ECMO Type

| Indicator | Overall (N=122) | VA-ECMO (N=93) | VV-ECMO (N=29) | P |
| --- | --- | --- | --- | --- |
| Male, n (%) | 79 (64.75) | 67 (72.04) | 12 (41.38) | 0.005 |
| Age, years | 59.00 [46.00;70.00] | 56.00 [45.00;68.00] | 70.00 [59.00;75.00] | 0.003 |
| Hypertension, n (%) | 52 (42.62) | 44 (47.31) | 8 (27.59) | 0.097 |
| Diabetes Mellitus, n (%) | 29 (23.77) | 27 (29.03) | 2 (6.90) | 0.028 |
| Hepatic Insufficiency, n (%) | 39 (31.97) | 28 (30.11) | 11 (37.93) | 0.575 |
| Renal Insufficiency, n (%) | 35 (28.69) | 27 (29.03) | 8 (27.59) | 1 |
| Malignant Tumor, n (%) | 7 (5.74) | 4 (4.30) | 3 (10.34) | 0.355 |
| Cardiac disease, n (%) | 77 (63.11) | 77 (82.80) | 0 (0.00) | <0.001 |
| Pulmonary disease, n (%) | 25 (20.49) | 0 (0.00) | 25 (86.21) | <0.001 |
| Cardiac arrest, n (%) | 70 (57.38) | 64 (68.82) | 6 (20.69) | <0.001 |
| Sepsis, n (%) | 19 (15.57) | 11 (11.83) | 8 (27.59) | 0.074 |
| Shock, n (%) | 87 (71.31) | 66 (70.97) | 21 (72.41) | 1 |
| Blood routine test |  |  |  |  |
| WBC (10⁹/L) | 11.78 [8.85;16.86] | 11.78 [8.50;16.90] | 12.93 [10.38;16.53] | 0.633 |
| Neutrophil (10⁹/L) | 8.96 [5.05;13.76] | 7.23 [5.00;14.30] | 10.76 [8.00;13.52] | 0.118 |
| Monocyte (10⁹/L) | 0.50 [0.30;0.70] | 0.50 [0.35;0.72] | 0.42 [0.30;0.50] | 0.025 |
| Lymphocyte (10⁹/L) | 1.75 [0.81;4.02] | 1.90 [1.10;4.60] | 1.00 [0.40;2.09] | 0.001 |
| Hb (g/L) | 124.28 (28.27) | 125.98 (29.61) | 118.83 (23.06) | 0.18 |
| Platelet (10⁹/L) | 181.39 (79.42) | 185.57 (76.40) | 167.97 (88.50) | 0.34 |
| Myocardial enzyme |  |  |  |  |
| hs-cTn (ng/mL) | 0.20 [0.03;4.41] | 0.84 [0.05;4.73] | 0.04 [0.02;0.20] | <0.001 |
| CK (U/L) | 388.00 [114.00;1848.00] | 542.00 [176.00;2388.50] | 103.50 [42.50;692.75] | 0.002 |
| Biochemistry Liver function |  |  |  |  |
| ALT (U/L) | 57.00 [27.00;130.50] | 57.00 [26.00;183.00] | 55.00 [30.00;83.00] | 0.594 |
| AST (U/L) | 112.00 [33.50;346.50] | 122.00 [35.00;390.00] | 84.00 [33.00;154.00] | 0.172 |
| TP (g/L) | 60.40 [52.82;65.72] | 61.20 [53.80;66.10] | 59.80 [50.80;62.50] | 0.278 |
| Alb (g/L) | 33.40 (6.80) | 34.10 (6.81) | 31.18 (6.40) | 0.04 |
| ALP (U/L) | 84.00 [67.00;105.00] | 84.00 [62.00;100.00] | 91.00 [76.00;128.00] | 0.045 |
| Total Bilirubin (μmol/L) | 10.50 [6.73;14.68] | 10.30 [6.70;14.00] | 12.40 [8.20;17.50] | 0.135 |
| Renal function |  |  |  |  |
| Creatinine (μmol/L) | 106.00 [80.25;136.75] | 106.00 [85.00;142.00] | 85.00 [67.00;127.00] | 0.05 |
| eGFR | 66.95 (28.66) | 64.73 (26.52) | 73.13 (33.81) | 0.289 |
| Metabolic index |  |  |  |  |
| Glucose (mmol/L) | 12.65 [9.06;15.44] | 12.70 [9.20;14.90] | 12.60 [9.01;16.70] | 0.957 |
| Lactic Acid (mmol/L) | 6.10 [2.80;11.62] | 7.70 [3.00;12.80] | 3.20 [2.10;5.10] | 0.002 |
| pH Value | 7.31 [7.13;7.41] | 7.28 [7.10;7.39] | 7.38 [7.28;7.41] | 0.036 |
| Oxygenation Index | 208.50 [90.50;373.25] | 224.00 [105.00;376.00] | 116.00 [75.00;279.00] | 0.131 |
| Coagulation |  |  |  |  |
| Fibrinogen (g/L) | 3.10 [2.31;3.90] | 3.10 [2.28;3.68] | 3.59 [2.50;5.40] | 0.106 |
| APTT (s) | 45.10 [36.70;120.97] | 45.50 [37.80;176.90] | 38.70 [33.00;52.20] | 0.022 |
| PT (s) | 15.40 [14.00;18.20] | 15.50 [14.20;18.90] | 14.50 [13.90;15.70] | 0.036 |
| INR | 1.23 [1.10;1.58] | 1.26 [1.11;1.65] | 1.13 [1.08;1.27] | 0.053 |
| Derived ratio indicators |  |  |  |  |
| NLR | 5.62 [1.63;16.00] | 4.34 [1.19;13.85] | 8.53 [5.62;34.40] | 0.001 |
| PLR | 93.33 [50.36;191.19] | 84.48 [45.34;155.17] | 165.00 [69.14;371.43] | 0.003 |
| MWR | 0.04 [0.03;0.06] | 0.05 [0.03;0.06] | 0.03 [0.02;0.04] | 0.005 |
| LAR | 17.41 [8.12;34.29] | 18.16 [8.53;38.82] | 10.57 [6.63;20.48] | 0.03 |
| AAR | 144.24 [100.97;302.45] | 144.24 [100.94;384.62] | 124.65 [101.06;160.62] | 0.185 |
| AHR | 0.40 [0.28;0.99] | 0.40 [0.28;1.13] | 0.39 [0.28;0.48] | 0.327 |
| PNI | 44.88 [35.26;55.15] | 46.10 [37.50;56.60] | 38.90 [29.50;45.45] | 0.004 |
| SII | 874.33 [260.64;2589.79] | 657.68 [235.88;1985.94] | 2065.14 [506.10;4773.00] | 0.003 |
| Survival, n (%) |  |  |  | 0.912 |
| Survival | 81 (66.39) | 61 (65.59) | 20 (68.97) |  |
| Non-survival | 41 (33.61) | 32 (34.41) | 9 (31.03) |  |

Notes: Data were presented as median [P25–P75] or mean (SD). P value was obtained by Kruskal–Wallis H test or χ² test. P < 0.05 was considered statistically significant.

Abbreviations: ALT: alanine aminotransferase; AST: aspartate aminotransferase; TP: total protein; Alb: albumin; CK: creatine kinase; eGFR: estimated glomerular filtration rate; ALP: alkaline phosphatase; hs-cTn: high-sensitivity cardiac troponin; INR: international normalized ratio; APTT: activated partial thromboplastin time; PT: prothrombin time; WBC: white blood cell; Hb: hemoglobin; NLR: neutrophil–lymphocyte ratio; PLR: platelet–lymphocyte ratio; MWR: monocyte–white blood cell ratio; LAR: lactate–albumin ratio; AAR: APTT–albumin ratio; AHR: APTT–hemoglobin ratio; PNI: prognostic nutritional index; SII: systemic immune-inflammation index.
